# Supplementary material
Source: PubMed Central journal article supplement (PMC2441565)

## **Supplemental Data**

Supplemental Figure 1. *Klf5* and *ILK* were each inhibited with a second siRNA. (A-C) A second *Klf5* siRNA hairpin with a core sequence of 5'-CCACAGGAGGTGAACAATA-3' was utilized for these experiments. The control siRNA contained point mutations of the targeting sequence, as indicated: 5'-CTACCGAAGTTGCACGATA-3' (mutated bases underlined). (D-F) A second *ILK* siRNA hairpin with a core sequence of 5'-CCGCTGGCAGGGCAATGAT-3' was utilized. Control siRNA contained the sequence 5'-CAGTTGTCACGGTAACGAT-3' (mutated bases underlined). (B, E) Migration assays were performed in Transwell plates as described in Experimental Procedures. Migrating cells (purple) were stained with 0.005% crystal violet. (C, F) Results were compiled from three individual experiments and expressed as mean±SEM. Student's *t*-test was used for statistical analyses.

Supplemental Figure 2. Induction of *Klf5* siRNA did not significantly increase apoptosis in primary esophageal keratinocytes. (A) TUNEL assays were performed using the *In Situ Cell Death Detection Kit* (Roche). Apoptotic cells were stained in red, with DAPI stain in blue. Magnification was 200x. (B) The number of positive cells as a percentage of total number of cells was determined in five 200x fields. By Student's *t*-test, there were no significant differences in the percentage of apoptotic cells when primary esophageal keratinocytes were infected with siRNA against *Klf5*, compared to those infected with mismatch controls. Results were expressed as mean±SEM.

Supplemental Figure 3. Klf5 and ILK were both expressed in keratinocytes migrating across the wound in scratch assays. Wounds, indicated by diagonal lines, were generated using a plastic pipet tip when cells reached 90% confluence. Cells were grown for an additional 24 hours and then fixed with 4% paraformaldehyde in PBS for 10 minutes at room temperature and stained for Klf5 and ILK as described in Experimental Procedures.

Supplemental Figure 4. Inhibition of MEK/ERK signaling did not alter ILK expression or ILK kinase activity in keratinocytes with overexpression of *Klf5*. Cells with overexpression of Klf5 were treated for 24 hours with DMSO or with the MEK inhibitor PD98059 at 50 $\mu$ M in DMSO. (A) ILK expression, as determined by Western blots, and ILK kinase activity, assessed as described in Experimental Procedures, were not changed by treatment with PD98059. (B) ILK kinase assays (n=3) were quantified to confirm that inhibition of MEK/ERK signaling did not alter ILK kinase activity. Results were expressed as mean $\pm$ SEM. Student's *t*-test was used for statistical analyses.

Supplemental Figure 5. Inhibition of *Cdc42* decreased cell migration. pFB-Klf5 infected keratinocytes were transduced with pGIPZ lentiviral vector (OpenBiosystem) containing siRNA targeted against the sequence 5'-CACAGCTGGACAAGAAGATTA-3' from *Cdc42* or a control sequence (5'-CATAGATGAACGAGCAGAGTA-3', mismatches underlined). (A-B) pGIPZ-siCdc42 decreased expression of Cdc42 as well as activated Cdc42 (Cdc42-GTP). (B) Inhibition of *Cdc42* decreased migration in *Klf5* overexpressing keratinocytes. Migration assays were performed in Transwell plates as described in Experimental Procedures. (C) Data from three

individual experiments (mean $\pm$ SEM) confirmed that suppression of *Cdc42* decreased migration in *Klf5* overexpressing keratinocytes. Student's *t*-test was used for statistical analyses.

# Supplementary Figure 1

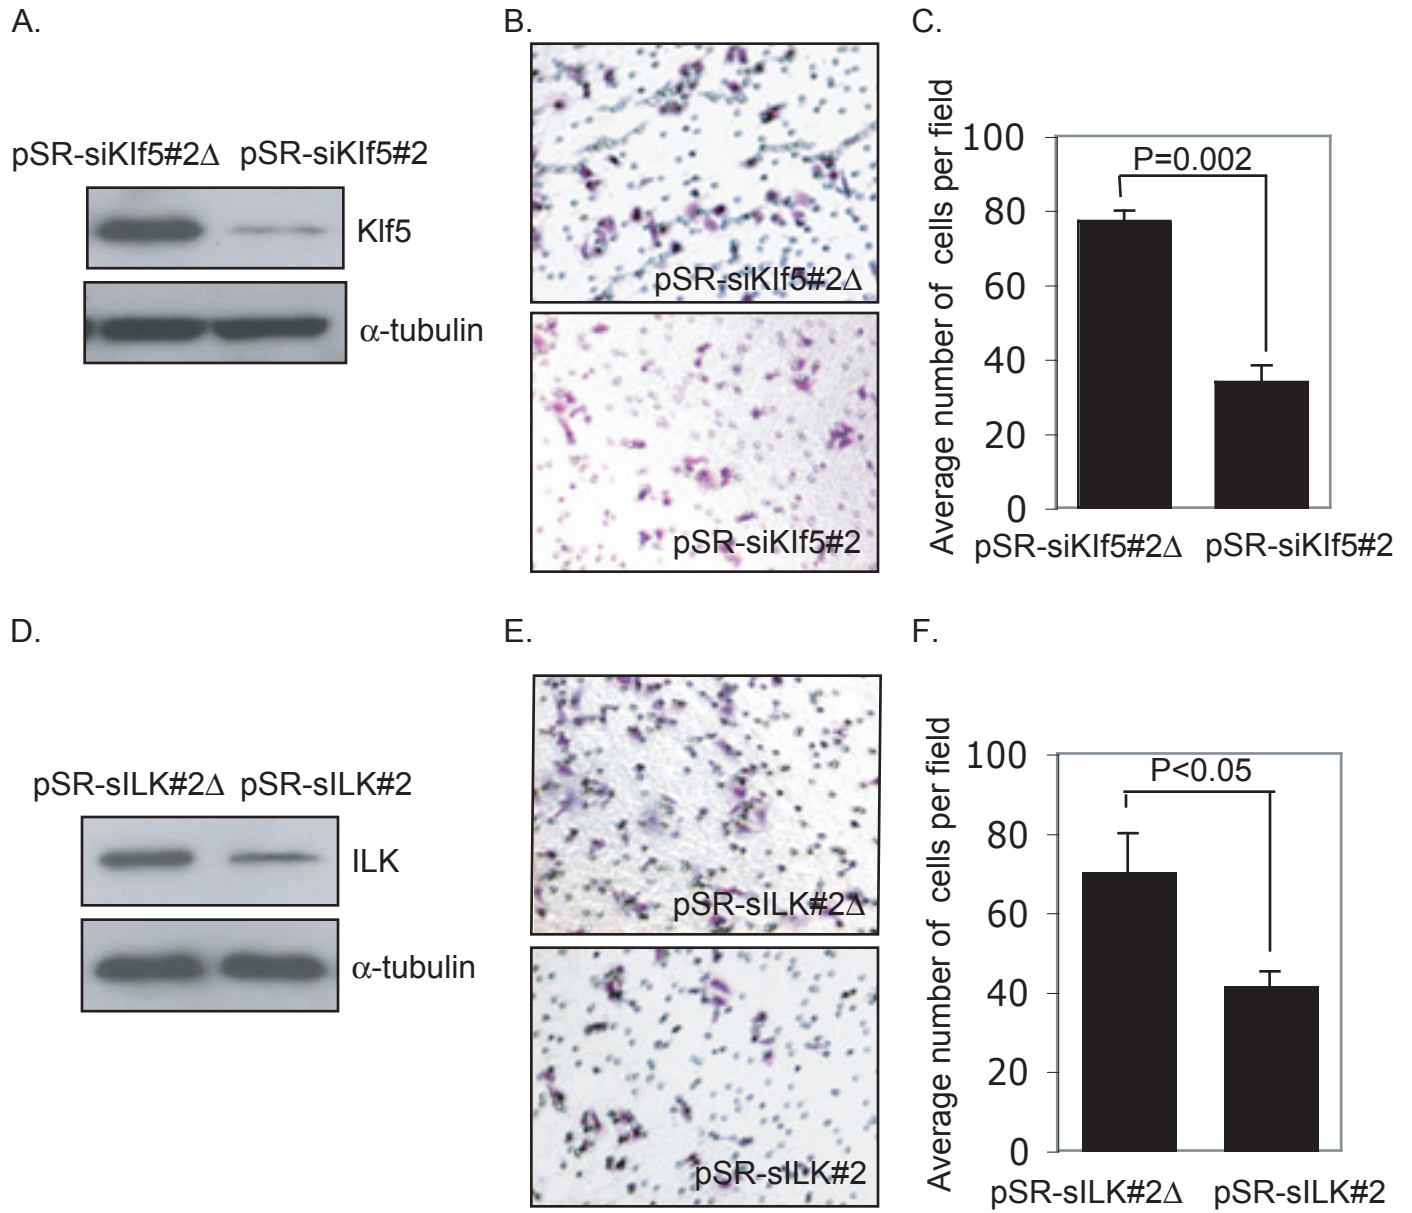

## Supplementary Figure 2

A.

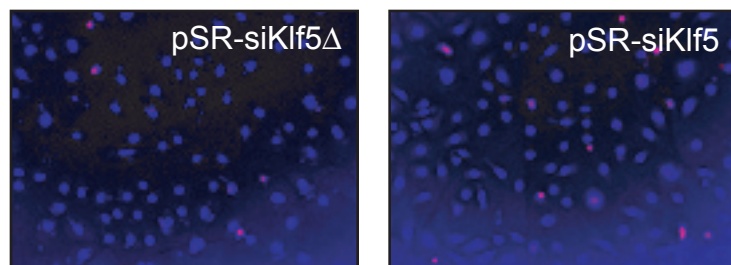

B.

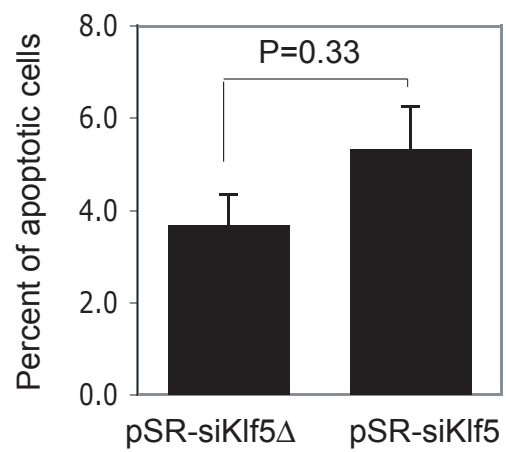

Supplementary Figure 3

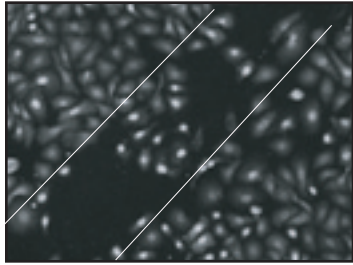

Klf5

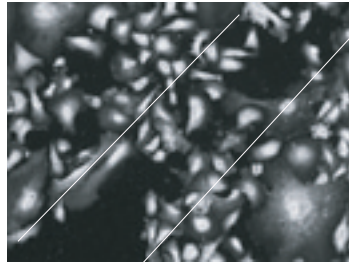

ILK

# Supplementary Figure 4

A.

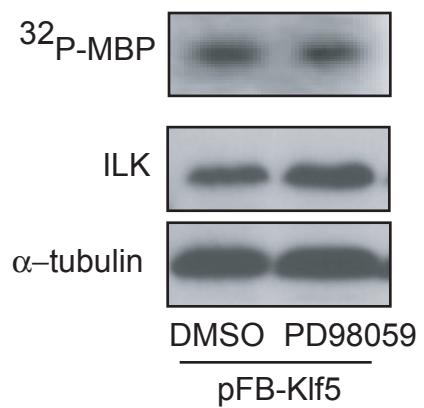

B.

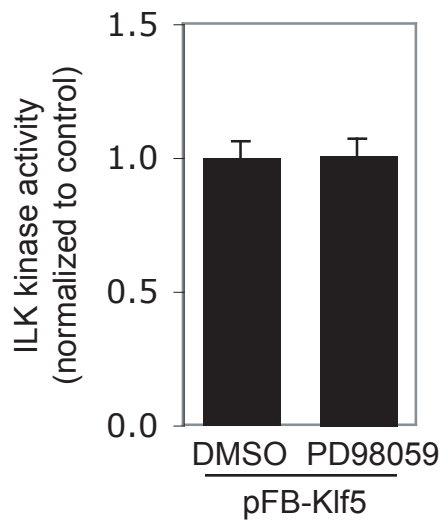

# Supplementary Figure 5

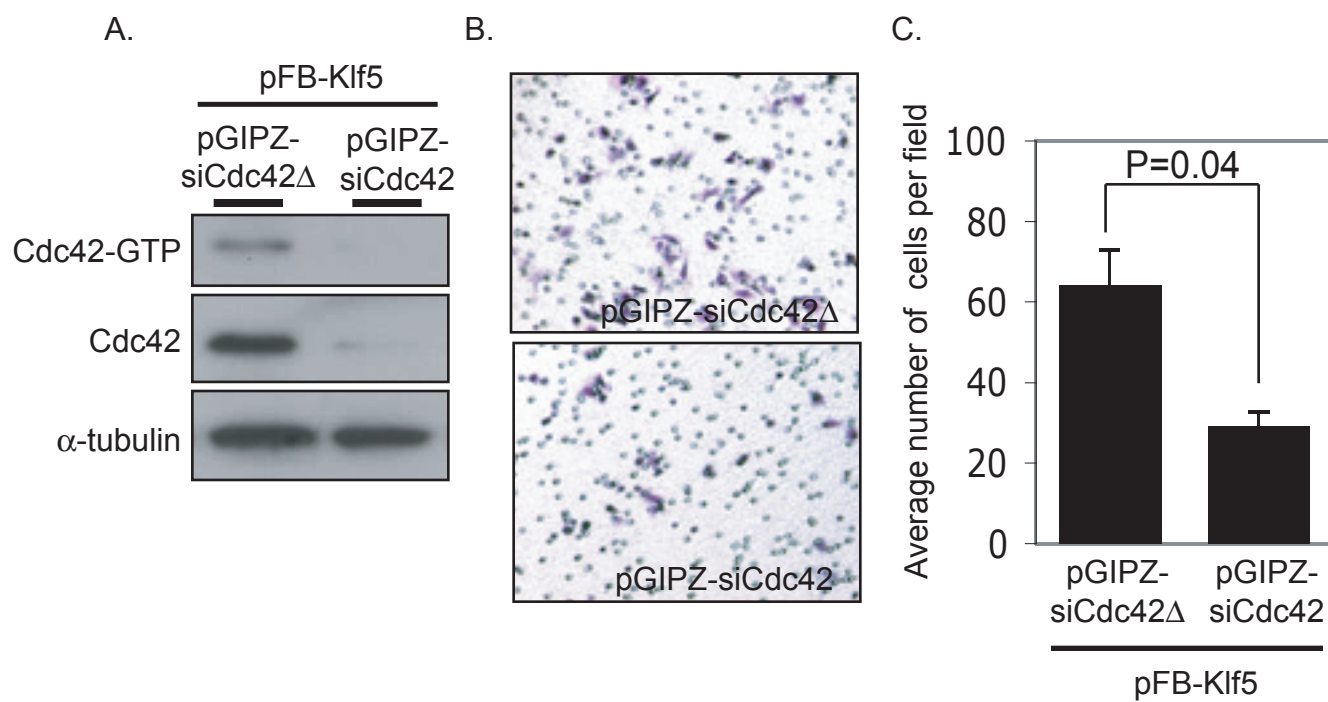

Supplement: M801384200_1.pdf [file M801384200_1.pdf]
